# Supplementary material for: Simple synthetic access to [Au(IBiox)Cl] complexes
Source: Royal Society of Chemistry journal article supplement (doi:10.1039/d3dt01357j), 2023-01-01

Electronic Supplementary Material (ESI) for *Dalton Transactions*.  
This journal is © The Royal Society of Chemistry 2020

Supporting Information

## Simple synthetic access to [Au(IBiox)Cl] complexes

Ekaterina A. Martynova,<sup>a</sup> Marco Zuccarello,<sup>b</sup> Domenic Kronenberg,<sup>b</sup> Marek Beliš,<sup>a</sup> Agnieszka Czapik,<sup>c</sup> Ziyun Zhang,<sup>d</sup> Kristof Van Hecke,<sup>a</sup> Marcin Kwit,<sup>c</sup> Olivier Baudoin,<sup>\*b</sup> Luigi Cavallo<sup>\*d</sup> and Steven P. Nolan<sup>\*a</sup>

### Abstract:

A sustainable entryway into chiral and achiral gold-IBiox complexes is reported. The gold complexes were synthesized using a simple, air-tolerant weak base protocol carried out in a green solvent. Their catalytic activity was examined in the hydroamination of alkynes. The steric protection afforded the gold center by these ligands was quantified using the %Vbur model and compared with the most commonly encountered NHCs.

### Table of contents

|                                    |   |
|------------------------------------|---|
| <b>Computational details</b> ..... | 2 |
| <b>X-ray Crystallography</b> ..... | 6 |
| <b>References</b> .....            | 7 |
| <b>NMR Spectra</b> .....           | 8 |

## Computational details

Geometries were optimized with the Gaussian09<sup>1</sup> package using the PBE0 functional.<sup>2</sup> The electronic configuration of the system was described with the triple- $\zeta$  TZVP basis set<sup>3</sup> for main group atoms (C, H, N, Cl and O) and the relativistic Stuttgart-Dresden effective core potential with the associated valence triple- $\zeta$  basis set for Au.<sup>4</sup> All geometries were confirmed as minimum or transition state through frequency calculations.

### Cartesian coordinates of species reported in the context with solvent energies (in a.u.).

|                                    |           |           |           |                                    |           |           |           |
|------------------------------------|-----------|-----------|-----------|------------------------------------|-----------|-----------|-----------|
| [Au(IBiox <sup>t</sup> Pr)Cl] (3a) |           |           |           | H                                  | -4.697563 | 0.337864  | 1.022016  |
| E= -1362.56772834 A.U.             |           |           |           | C                                  | 3.271522  | -0.535693 | 0.374617  |
| Au                                 | 0.000297  | 1.635964  | 0.000076  | H                                  | 2.847254  | 0.442243  | 0.631262  |
| Cl                                 | 0.000948  | 3.932254  | -0.000029 | C                                  | 3.256592  | -1.405993 | 1.623286  |
| O                                  | -1.640575 | -3.366408 | 0.530034  | H                                  | 2.244062  | -1.546456 | 2.008515  |
| O                                  | 1.639469  | -3.366827 | -0.529838 | H                                  | 3.845481  | -0.935907 | 2.413687  |
| N                                  | -0.986909 | -1.202427 | 0.353010  | H                                  | 3.688244  | -2.394097 | 1.437078  |
| N                                  | 0.986347  | -1.202682 | -0.352736 | C                                  | 4.686582  | -0.313793 | -0.143335 |
| C                                  | -0.000155 | -0.352515 | 0.000135  | H                                  | 5.173777  | -1.256813 | -0.411903 |
| C                                  | -2.382016 | -1.079301 | 0.746459  | H                                  | 5.301316  | 0.158824  | 0.625178  |
| H                                  | -2.454305 | -0.416898 | 1.611930  | H                                  | 4.697335  | 0.336417  | -1.022162 |
| C                                  | -2.640309 | -2.544420 | 1.175424  |                                    |           |           |           |
| H                                  | -2.531156 | -2.660173 | 2.256672  | [Au(IBiox <sup>t</sup> Bu)Cl] (3b) |           |           |           |
| H                                  | -3.616271 | -2.914682 | 0.867106  | E= -1441.11477991 A.U.             |           |           |           |
| C                                  | -0.637159 | -2.531417 | 0.220672  | Au                                 | -0.000548 | 1.670160  | 0.000052  |
| C                                  | 0.636195  | -2.531602 | -0.220511 | Cl                                 | -0.001377 | 3.968662  | 0.000240  |
| C                                  | 2.638934  | -2.545080 | -1.175919 | O                                  | -1.595110 | -3.345812 | 0.632843  |
| H                                  | 2.528804  | -2.660496 | -2.257116 | O                                  | 1.596843  | -3.345252 | -0.631797 |
| H                                  | 3.615017  | -2.915737 | -0.868495 | N                                  | -0.995273 | -1.175450 | 0.344919  |
| C                                  | 2.381428  | -1.079987 | -0.746477 | N                                  | 0.996027  | -1.175066 | -0.344426 |
| H                                  | 2.453796  | -0.417359 | -1.611767 | C                                  | 0.000128  | -0.324219 | -0.000037 |
| C                                  | -3.271673 | -0.534330 | -0.374655 | C                                  | -2.380903 | -1.088058 | 0.811395  |
| H                                  | -2.847055 | 0.443552  | -0.630912 | H                                  | -2.442851 | -0.340198 | 1.604824  |
| C                                  | -3.256765 | -1.404238 | -1.623608 | C                                  | -2.497547 | -2.514051 | 1.395990  |
| H                                  | -2.244151 | -1.545366 | -2.008376 | H                                  | -2.181017 | -2.532288 | 2.443010  |
| H                                  | -3.844886 | -0.933457 | -2.414167 | H                                  | -3.490958 | -2.944161 | 1.306297  |
| H                                  | -3.689279 | -2.392064 | -1.437915 | C                                  | -0.631249 | -2.505600 | 0.229612  |
| C                                  | -4.686788 | -0.312137 | 0.143025  | C                                  | 0.632641  | -2.505378 | -0.228654 |
| H                                  | -5.174319 | -1.255080 | 0.411234  | C                                  | 2.498490  | -2.513318 | -1.395677 |
| H                                  | -5.301193 | 0.160859  | -0.625517 | H                                  | 2.181445  | -2.532044 | -2.442536 |

|   |           |           |           |   |           |           |           |
|---|-----------|-----------|-----------|---|-----------|-----------|-----------|
| H | 3.492149  | -2.942923 | -1.306338 | O | -3.488011 | -1.722028 | -0.008948 |
| C | 2.381438  | -1.087179 | -0.811507 | N | -1.321200 | 1.048061  | 0.057068  |
| H | 2.442689  | -0.339558 | -1.605215 | N | -1.321531 | -1.047844 | -0.057196 |
| C | -3.435620 | -0.756941 | -0.272679 | C | -0.473110 | -0.000010 | -0.000052 |
| C | -3.176683 | 0.621946  | -0.872986 | C | -1.210175 | 2.511998  | -0.003871 |
| H | -3.129057 | 1.399190  | -0.105840 | C | -2.670794 | 2.849580  | 0.390508  |
| H | -3.986980 | 0.878039  | -1.560906 | H | -2.752088 | 2.985704  | 1.473551  |
| H | -2.241250 | 0.656641  | -1.433373 | H | -3.055225 | 3.727643  | -0.125400 |
| C | -4.802780 | -0.724757 | 0.417370  | C | -2.650025 | 0.673243  | 0.025080  |
| H | -5.097097 | -1.694932 | 0.825585  | C | -2.650223 | -0.672562 | -0.025152 |
| H | -5.568936 | -0.434305 | -0.304930 | C | -2.671757 | -2.848945 | -0.390416 |
| H | -4.821100 | 0.008573  | 1.228988  | H | -2.753124 | -2.985234 | -1.473432 |
| C | -3.442585 | -1.799426 | -1.389584 | H | -3.056502 | -3.726763 | 0.125655  |
| H | -2.476881 | -1.844326 | -1.899586 | C | -1.211026 | -2.511840 | 0.003865  |
| H | -4.194343 | -1.529821 | -2.135367 | C | -0.213214 | 3.058109  | 0.999422  |
| H | -3.680212 | -2.802350 | -1.026926 | H | -0.432698 | 2.700191  | 2.007053  |
| C | 3.436416  | -0.755193 | 0.272033  | H | -0.249897 | 4.150105  | 0.999198  |
| C | 3.176901  | 0.623716  | 0.872047  | H | 0.801288  | 2.749665  | 0.739319  |
| H | 3.128488  | 1.400687  | 0.104665  | C | -0.884230 | 2.945650  | -1.427083 |
| H | 3.987333  | 0.880525  | 1.559542  | H | 0.091960  | 2.557070  | -1.723150 |
| H | 2.241682  | 0.658038  | 1.432817  | H | -0.854893 | 4.035910  | -1.488150 |
| C | 3.444416  | -1.797394 | 1.389186  | H | -1.635232 | 2.578520  | -2.130393 |
| H | 2.478941  | -1.842771 | 1.899577  | C | -0.885269 | -2.945540 | 1.427118  |
| H | 4.196305  | -1.527149 | 2.134595  | H | 0.091483  | -2.558166 | 1.722918  |
| H | 3.682503  | -2.800251 | 1.026656  | H | -0.857368 | -4.035826 | 1.488441  |
| C | 4.803309  | -0.722375 | -0.418522 | H | -1.635644 | -2.577270 | 2.130496  |
| H | 5.098061  | -1.692475 | -0.826591 | C | -0.214138 | -3.058244 | -0.999321 |
| H | 5.569546  | -0.431280 | 0.303435  | H | -0.434090 | -2.701243 | -2.007172 |
| H | 4.820891  | 0.010753  | -1.230333 | H | -0.250097 | -4.150242 | -0.998208 |
|   |           |           |           | H | 0.800267  | -2.748955 | -0.739740 |

[Au(1BioxMe<sub>4</sub>)Cl] (3c)

E= -1284.02164462 A.U.

|    |           |           |           |
|----|-----------|-----------|-----------|
| Au | 1.519071  | -0.000151 | -0.000001 |
| Cl | 3.816569  | -0.000431 | 0.000004  |
| O  | -3.487427 | 1.723022  | 0.008863  |

[Au(1Biox6)Cl] (3d)

E= -1517.29310671 A.U.

|    |          |          |          |
|----|----------|----------|----------|
| Au | 0.000078 | 1.529728 | 0.000022 |
| Cl | 0.000277 | 3.829042 | 0.000082 |

|   |           |           |           |   |           |           |           |
|---|-----------|-----------|-----------|---|-----------|-----------|-----------|
| N | -1.045088 | -1.312157 | 0.107991  | H | -2.531447 | 0.762499  | 0.975942  |
| N | 1.044966  | -1.312250 | -0.107911 | H | -2.642091 | -0.526679 | 2.167185  |
| O | -1.717414 | -3.478849 | 0.090642  | H | -4.987447 | -1.012814 | 1.435517  |
| O | 1.717156  | -3.478977 | -0.090330 | H | -4.815598 | 0.665979  | 1.907660  |
| C | -0.000031 | -0.464388 | -0.000025 | H | -2.528426 | 0.130435  | -1.540096 |
| C | -0.671017 | -2.639241 | 0.058193  | H | -2.701603 | -1.564331 | -1.989994 |
| C | 0.670806  | -2.639294 | -0.057938 | H | -4.832366 | -0.287169 | -2.286851 |
| C | -2.508016 | -1.196442 | 0.127347  | H | -5.031577 | -1.590424 | -1.137171 |
| C | -2.837196 | -2.666720 | 0.501951  | H | -4.600186 | 1.355180  | -0.455717 |
| H | -2.957562 | -2.767123 | 1.585526  | H | -6.086845 | 0.442484  | -0.23869  |
| H | -3.720265 | -3.052023 | -0.003314 |   |           |           |           |
| C | 2.836908  | -2.666972 | -0.501958 |   |           |           |           |
| H | 2.957006  | -2.767450 | -1.585561 |   |           |           |           |
| H | 3.720056  | -3.052306 | 0.003133  |   |           |           |           |
| C | 4.511548  | -0.064643 | -1.153618 |   |           |           |           |
| C | 2.993882  | -0.209508 | -1.181114 |   |           |           |           |
| C | 2.507897  | -1.196641 | -0.127396 |   |           |           |           |
| C | 3.018202  | -0.809335 | 1.263178  |   |           |           |           |
| C | 4.531599  | -0.625971 | 1.291577  |   |           |           |           |
| C | 4.996377  | 0.358918  | 0.226806  |   |           |           |           |
| H | 2.531383  | 0.762255  | -0.976067 |   |           |           |           |
| H | 2.641841  | -0.526982 | -2.167258 |   |           |           |           |
| H | 4.987303  | -1.013164 | -1.435656 |   |           |           |           |
| H | 4.815438  | 0.665584  | -1.907977 |   |           |           |           |
| H | 2.528377  | 0.130161  | 1.540118  |   |           |           |           |
| H | 2.701723  | -1.564625 | 1.989892  |   |           |           |           |
| H | 4.832363  | -0.287161 | 2.286630  |   |           |           |           |
| H | 5.031632  | -1.590517 | 1.137082  |   |           |           |           |
| H | 4.599970  | 1.354991  | 0.455351  |   |           |           |           |
| H | 6.086714  | 0.442409  | 0.238416  |   |           |           |           |
| C | -4.511678 | -0.064324 | 1.153385  |   |           |           |           |
| C | -2.994019 | -0.209225 | 1.180993  |   |           |           |           |
| C | -3.018210 | -0.809112 | -1.263259 |   |           |           |           |
| C | -4.531614 | -0.625856 | -1.291754 |   |           |           |           |
| C | -4.996498 | 0.359093  | -0.227078 |   |           |           |           |

The DFT optimized structure of Au-IBiox complexes 3a-d shows linear geometry in all complexes and the bond lengths are similar compared with X-ray molecular structure for 3a-3d with Au-C<sub>NHC</sub> bonds of 1.99 Å and Au-Cl bonds of 2.30 Å. The Au-C<sub>NHC</sub> and Au-Cl bond lengths in the optimized 3d-DFT geometry are found the same as in 3b-DFT. In case of complex 3d the largest deviation between X-ray data and optimized geometries was noticed.

**Table S1.** Selected bond lengths (Å) and angles (°) for each complex from DFT optimized structures.

| Complex       | C <sub>NHC</sub> -Au | Au-Cl | C <sub>NHC</sub> -Au-Cl |
|---------------|----------------------|-------|-------------------------|
| <b>3a-DFT</b> | 1.988                | 2.296 | 180.0                   |
| <b>3b-DFT</b> | 1.994                | 2.299 | 180.0                   |
| <b>3c-DFT</b> | 1.992                | 2.298 | 180.0                   |
| <b>3d-DFT</b> | 1.994                | 2.299 | 180.0                   |

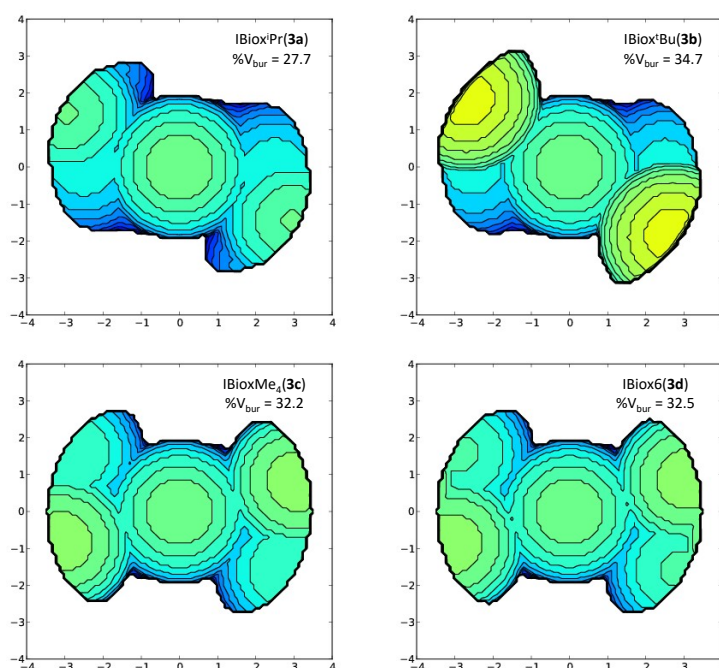

**Figure S1.** Steric maps and buried volumes of IBiox ligands in [Au(IBiox)Cl] complexes from DFT optimized geometries.

## X-ray Crystallography

Crystals that were of suitable quality for single crystal X-ray diffraction analysis were obtained in all cases by slow vapor diffusion of the antisolvent (pentane) into saturated solutions of the complexes (in dichloromethane) at 4 °C. 2238228-2238230, 2253267 **3a-d** contain the supplementary crystallographic data for this paper. These data can be obtained free of charge from The Cambridge Crystallographic Data Centre via [www.ccdc.cam.ac.uk/structures](http://www.ccdc.cam.ac.uk/structures)

**FigureS2.** X-ray molecular structures of complexes **3a-d** are presented (2238228-2238230, 2253267) showing thermal displacement ellipsoids at the 30% probability level (**3a**) and at the 60% probability level (**3b-d**), hydrogen atoms are omitted for clarity.

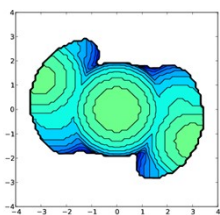

IBioxPr (**3a**)  
%V<sub>bur</sub> = 28.4

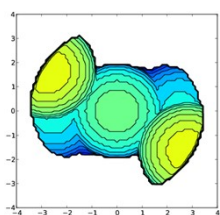

IBioxBu (**3b**)  
%V<sub>bur</sub> = 35.3

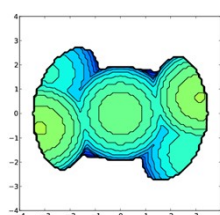

IBioxMe<sub>4</sub> (**3c**)  
%V<sub>bur</sub> = 31.8

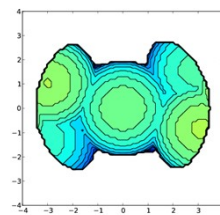

IBiox6 (**3d-1**)  
%V<sub>bur</sub> = 32.7

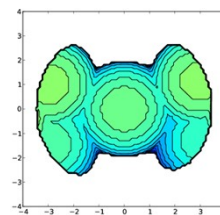

IBiox6 (**3d-2**)  
%V<sub>bur</sub> = 32.6

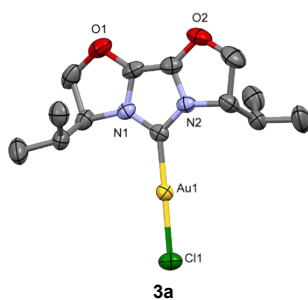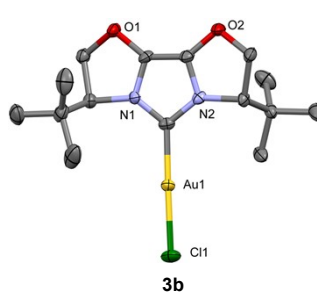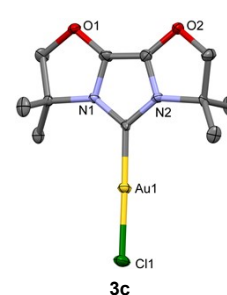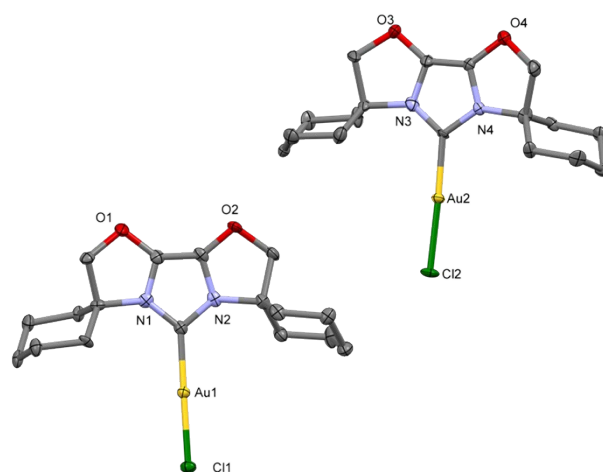

**Figure S3.** Steric maps and buried volumes of IBiox ligands (including two non-equivalent molecules in unit cell for the complex 3d) [Au(1Biox)Cl] complexes: NHC structures were extracted from crystal structures ( $r = 3.5 \text{ \AA}$ ,  $d = 2.0 \text{ \AA}$ , Bondi radii scaled by 1.17) to perform the calculations.



## References

- 1 Gaussian 09, Revision D.01, M. J. Frisch, G. W. Trucks, H. B. Schlegel, G. E. Scuseria, M., A. Robb, J. R. Cheeseman, G. Scalmani, V. Barone, B. Mennucci, G. A. Petersson, H., Nakatsuji, M. Caricato, X. Li, H. P. Hratchian, A. F. Izmaylov, J. Bloino, G. Zheng, J. L., Sonnenberg, M. Hada, M. Ehara, K. Toyota, R. Fukuda, J. Hasegawa, M. Ishida, T., Nakajima, Y. Honda, O. Kitao, H. Nakai, T. Vreven, J. A. Montgomery, Jr., J. E. Peralta, F., Ogliaro, M. Bearpark, J. J. Heyd, E. Brothers, K. N. Kudin, V. N. Staroverov, R., Kobayashi, J. Normand, K. Raghavachari, A. Rendell, J. C. Burant, S. S. Iyengar, J., Tomasi, M. Cossi, N. Rega, J. M. Millam, M. Klene, J. E. Knox, J. B. Cross, V. Bakken, C., Adamo, J. Jaramillo, R. Gomperts, R. E. Stratmann, O. Yazyev, A. J. Austin, R. Cammi, C., Pomelli, J. W. Ochterski, R. L. Martin, K. Morokuma, V. G. Zakrzewski, G. A. Voth, P., Salvador, J. J. Dannenberg, S. Dapprich, A. D. Daniels, Ö. Farkas, J. B. Foresman, J. V., and Ortiz, J. Cioslowski, and D. J. Fox, Gaussian, Inc., Wallingford CT, 2009., .
- 2 C. Adamo and V. Barone, *J. Chem. Phys.*, 1999, **110**, 6158–6170.
- 3 F. Weigend, F. Furche and R. Ahlrichs, *J. Chem. Phys.*, 2003, **119**, 12753–12762.
- 4 U. Häussermann, M. Dolg, H. Stoll, H. Preuss, P. Schwerdtfeger and R. M. Pitzer, *Mol. Phys.*, 1993, **78**, 1211–1224.

## NMR Spectra

$^1\text{H}$  NMR and  $^{13}\text{C}$   $\{^1\text{H}\}$  NMR for (3S,7S)-3,7-diisopropyl-2,3,7,8-tetrahydroimidazo[4,3-b:5,1-b']bis(oxazole)-4-ium chloride (2a):

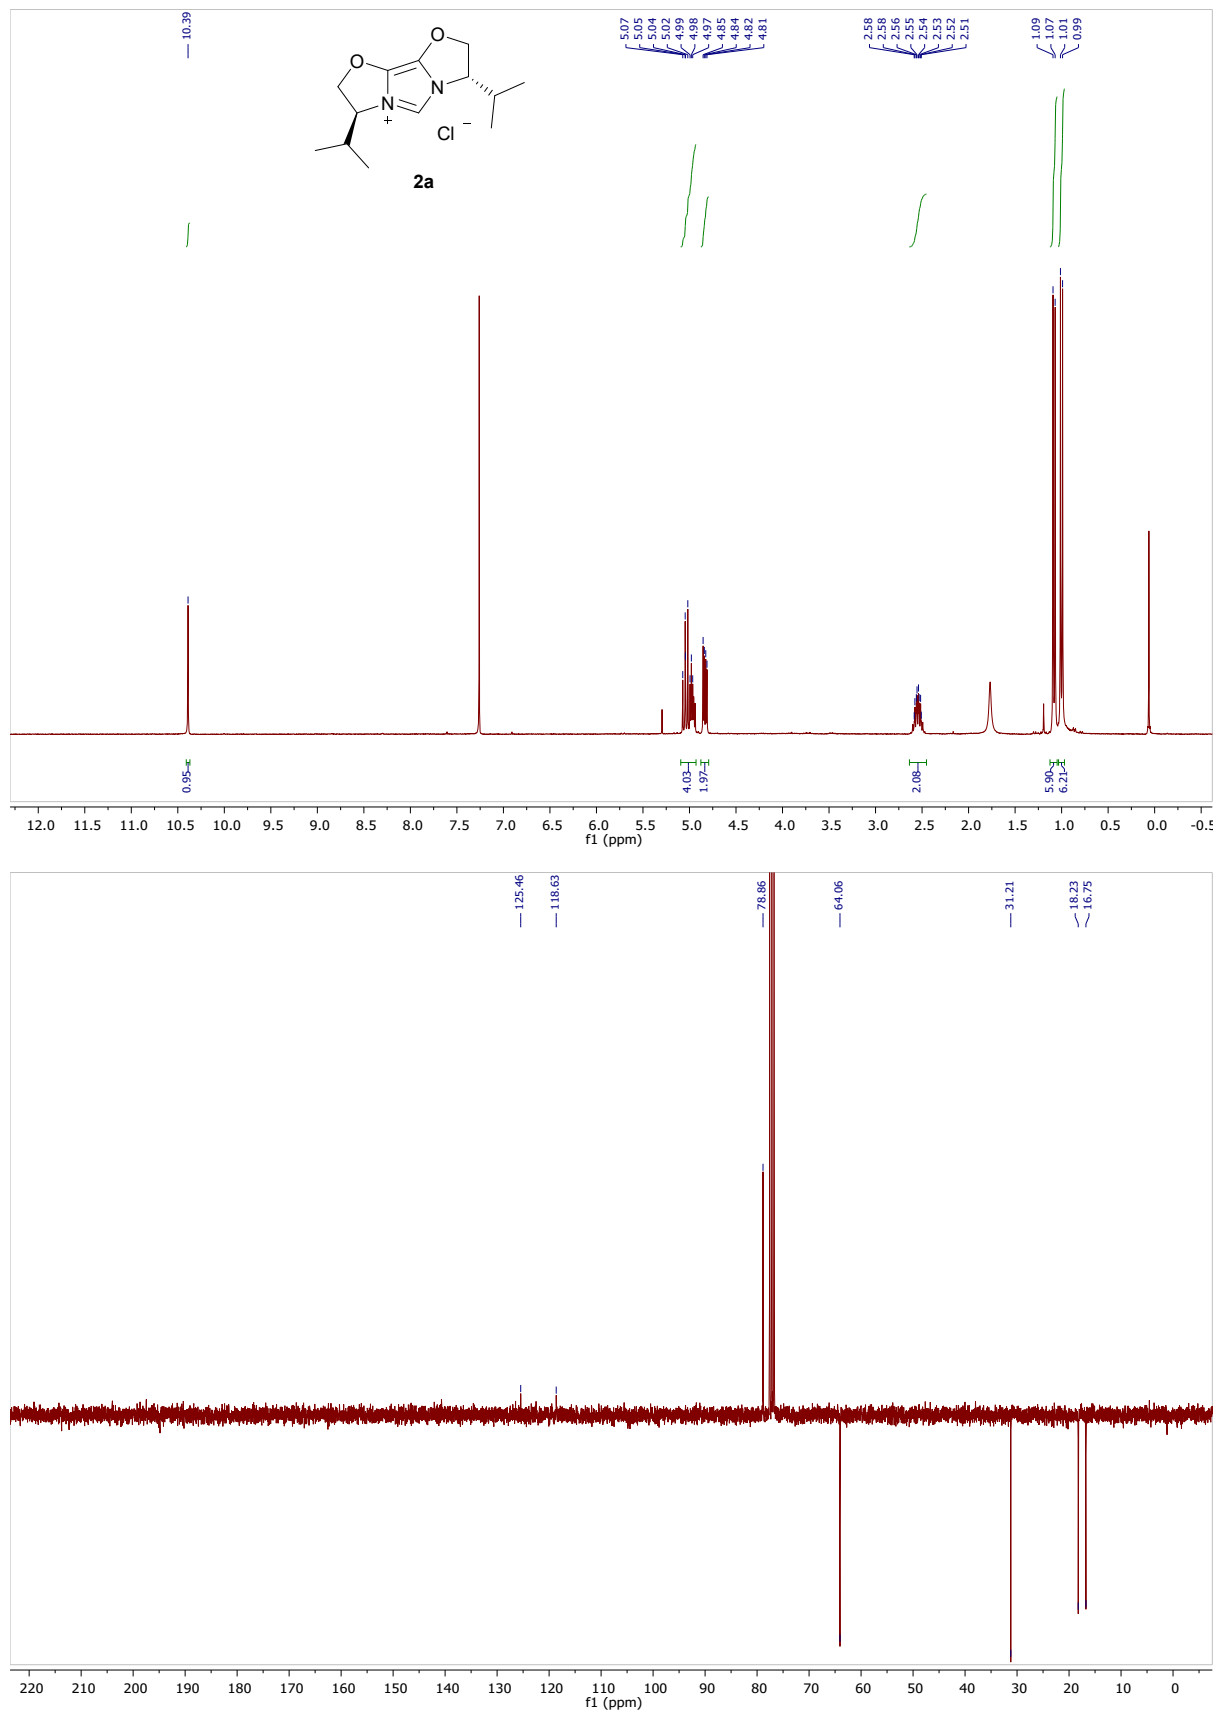

**<sup>1</sup>H NMR and <sup>13</sup>C {<sup>1</sup>H} NMR for (3S,7S)-3,7-di-tert-butyl-2,3,7,8-tetrahydroimidazo[4,3-b:5,1-b']bis(oxazole)-4-ium chloride (2b):**

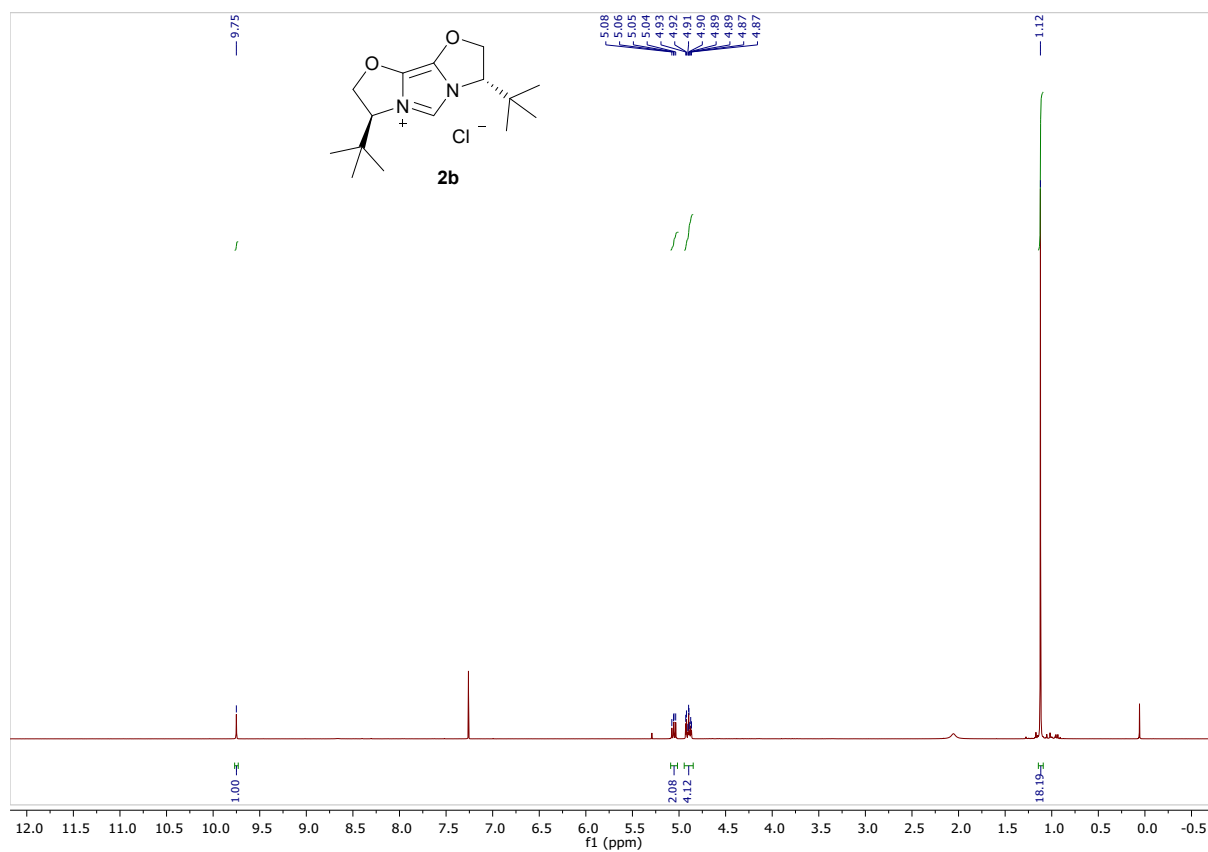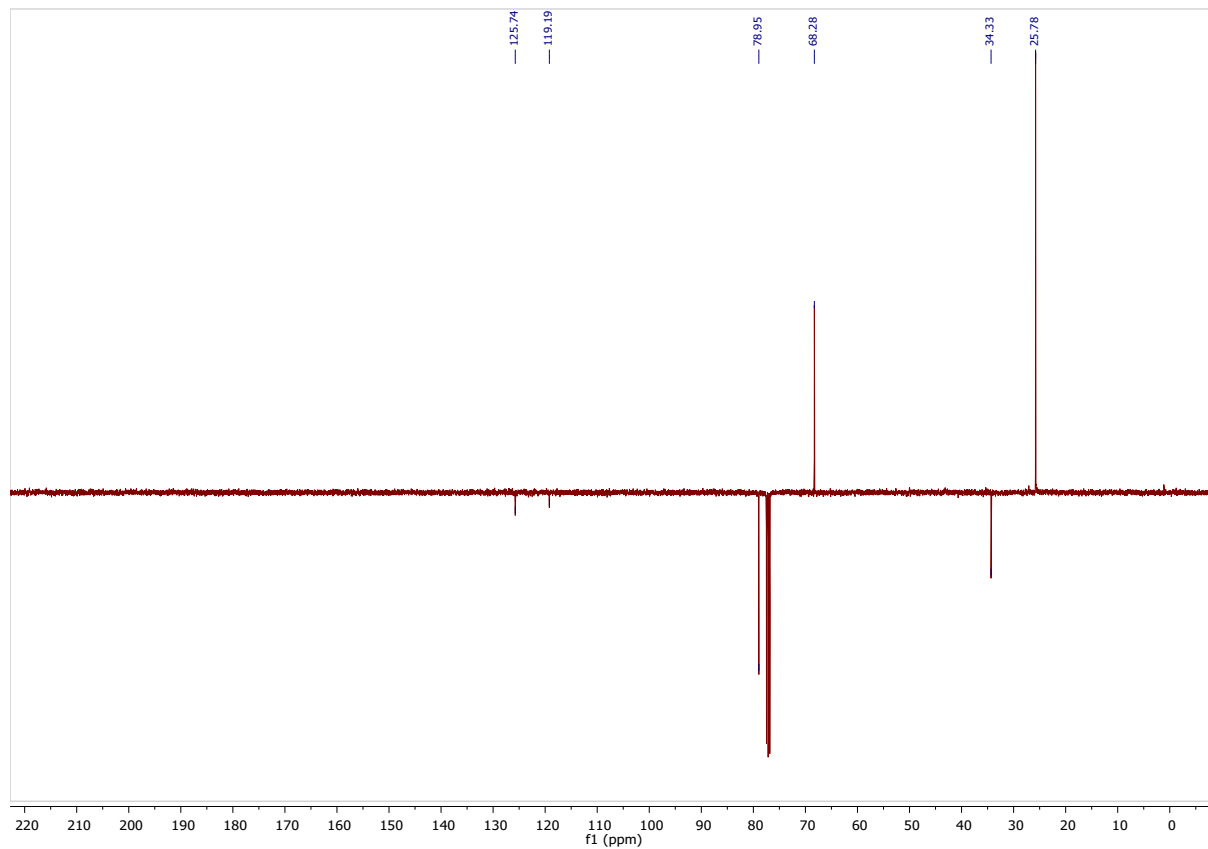

**<sup>1</sup>H NMR and <sup>13</sup>C {<sup>1</sup>H} NMR for 3,3,7,7-tetramethyl-2,3,7,8-tetrahydroimidazo[4,3-b:5,1-b']bis(oxazole)-4-ium chloride (2c):**

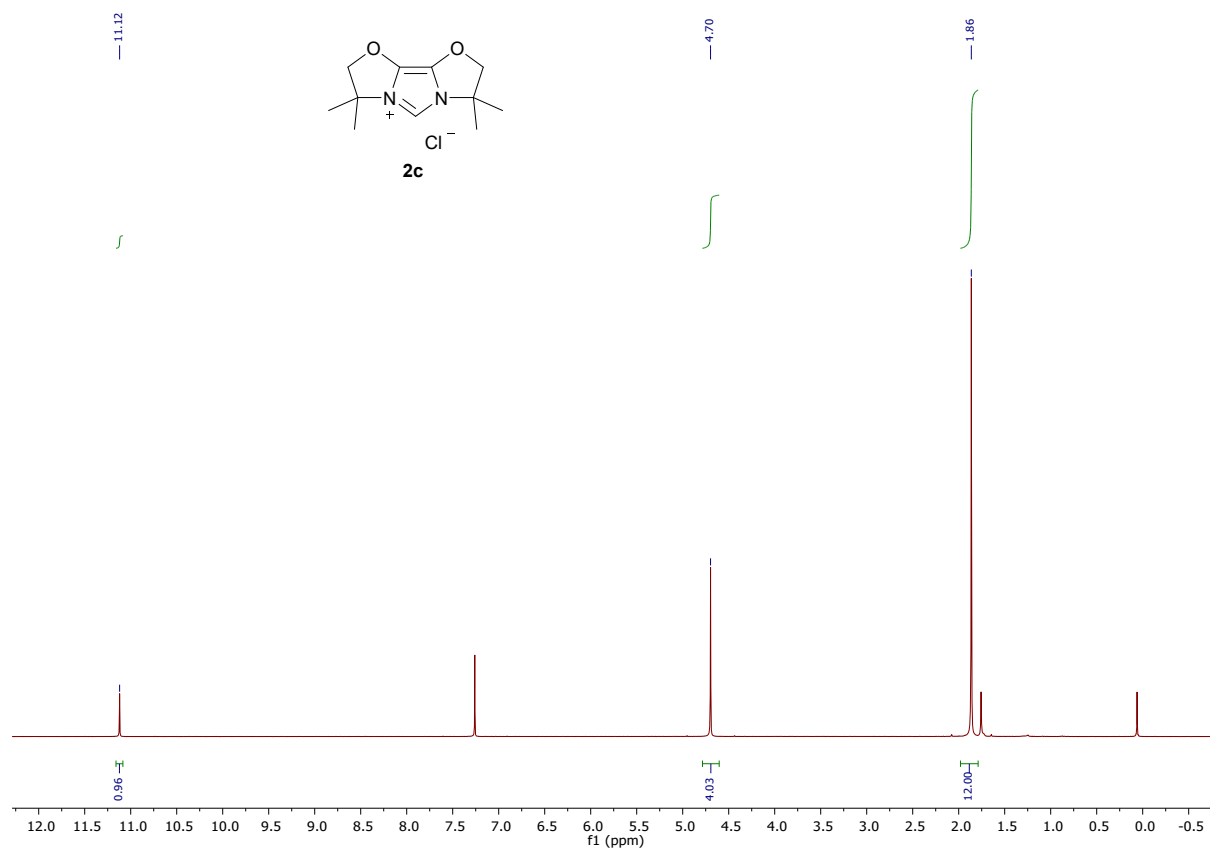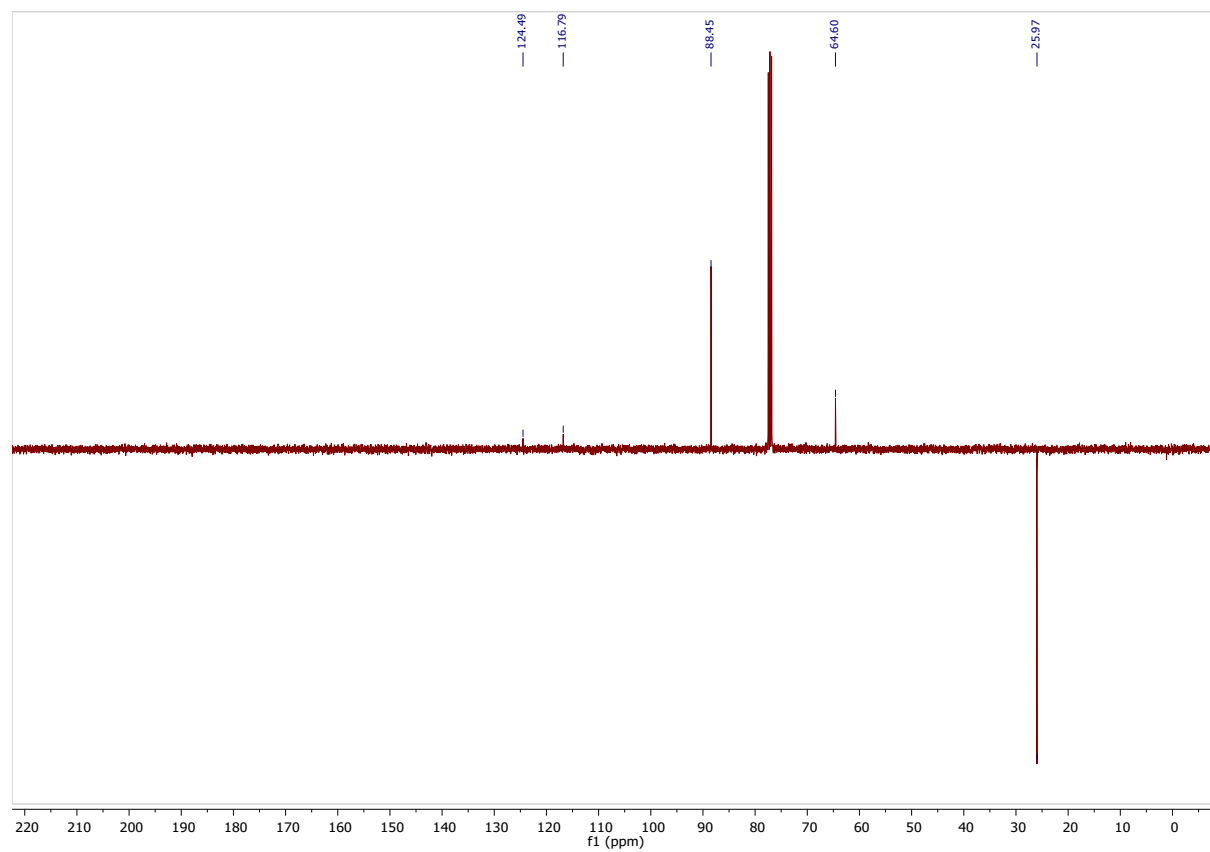

**<sup>1</sup>H NMR and <sup>13</sup>C {<sup>1</sup>H} NMR for 2'H,8'H-dispiro[cyclohexane-1,3'-imidazo[4,3-b:5,1-b']bis(oxazole)-7',1''-cyclohexan]-4'-ium chloride (2d):**

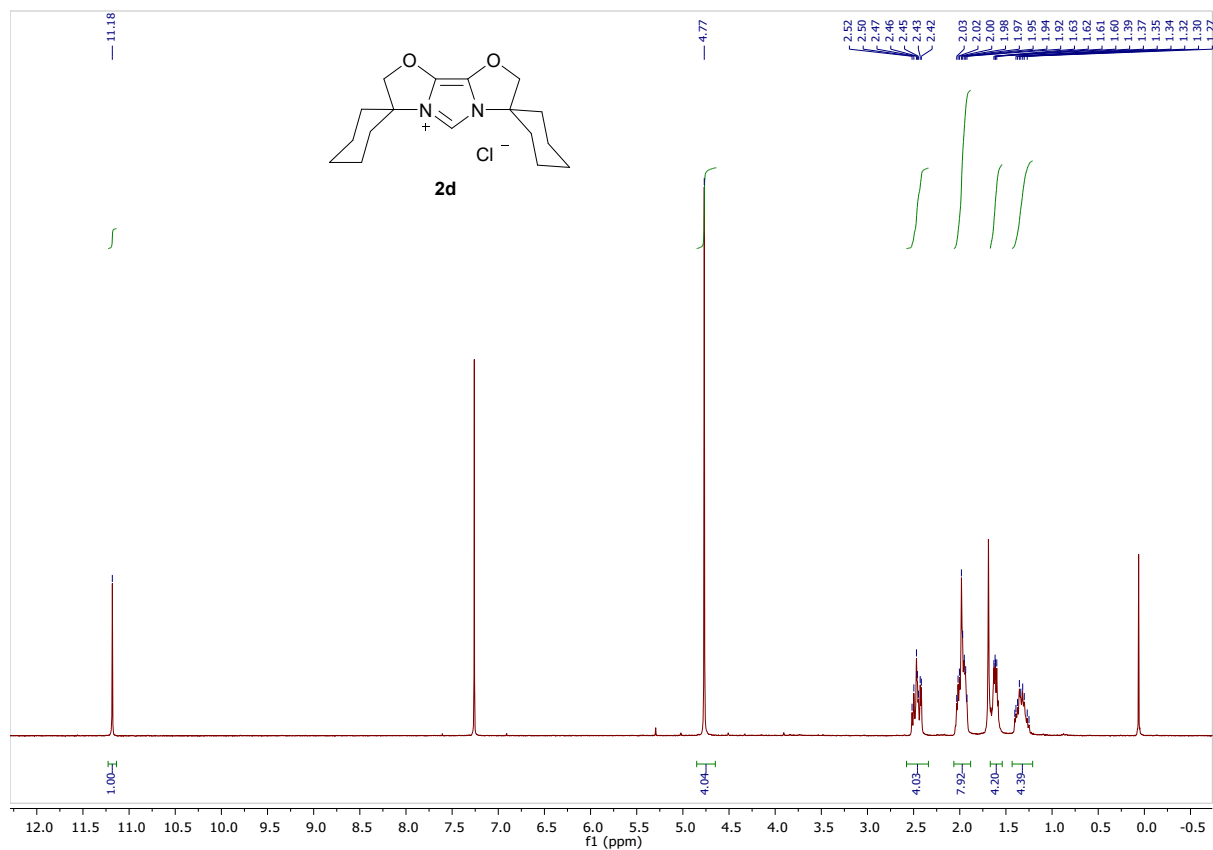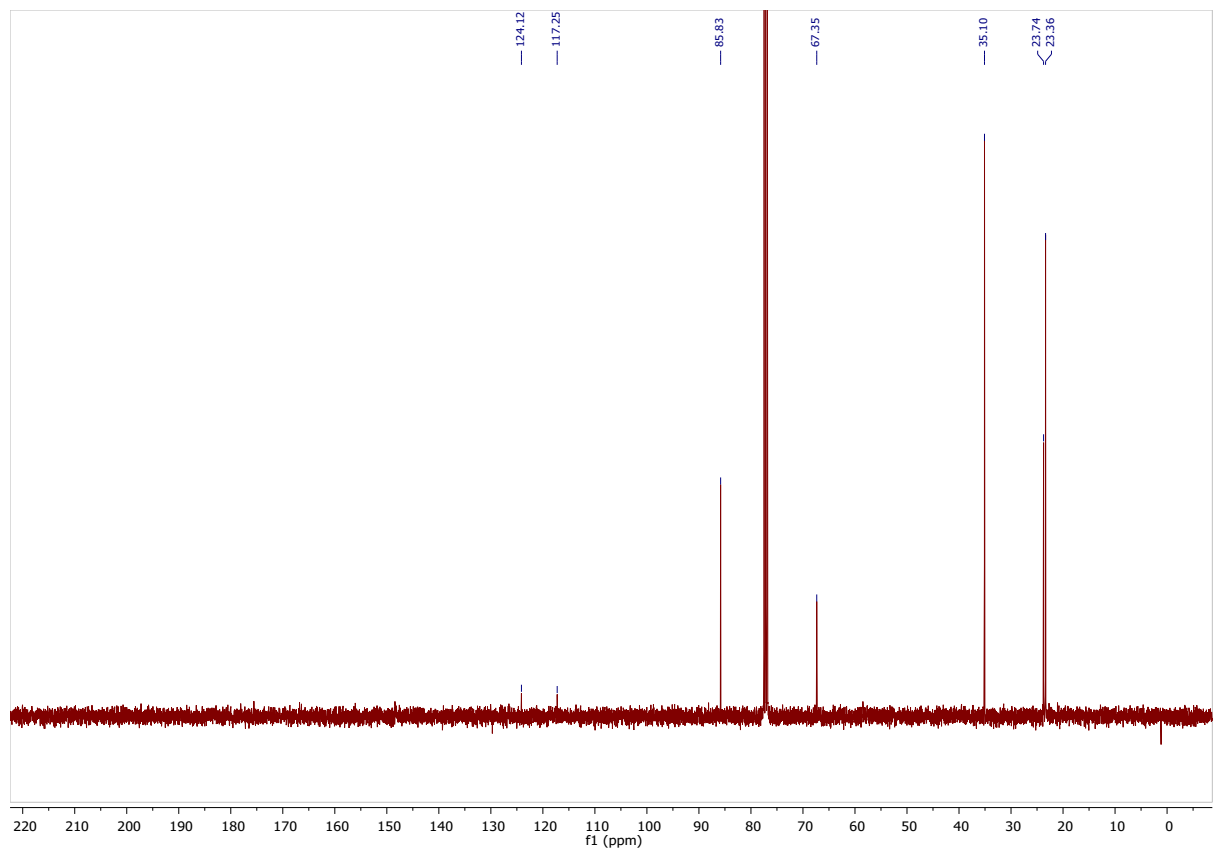

**<sup>1</sup>H NMR and <sup>13</sup>C {<sup>1</sup>H} NMR for [Au(1Biox<sup>1</sup>Pr)Cl] (3a):**

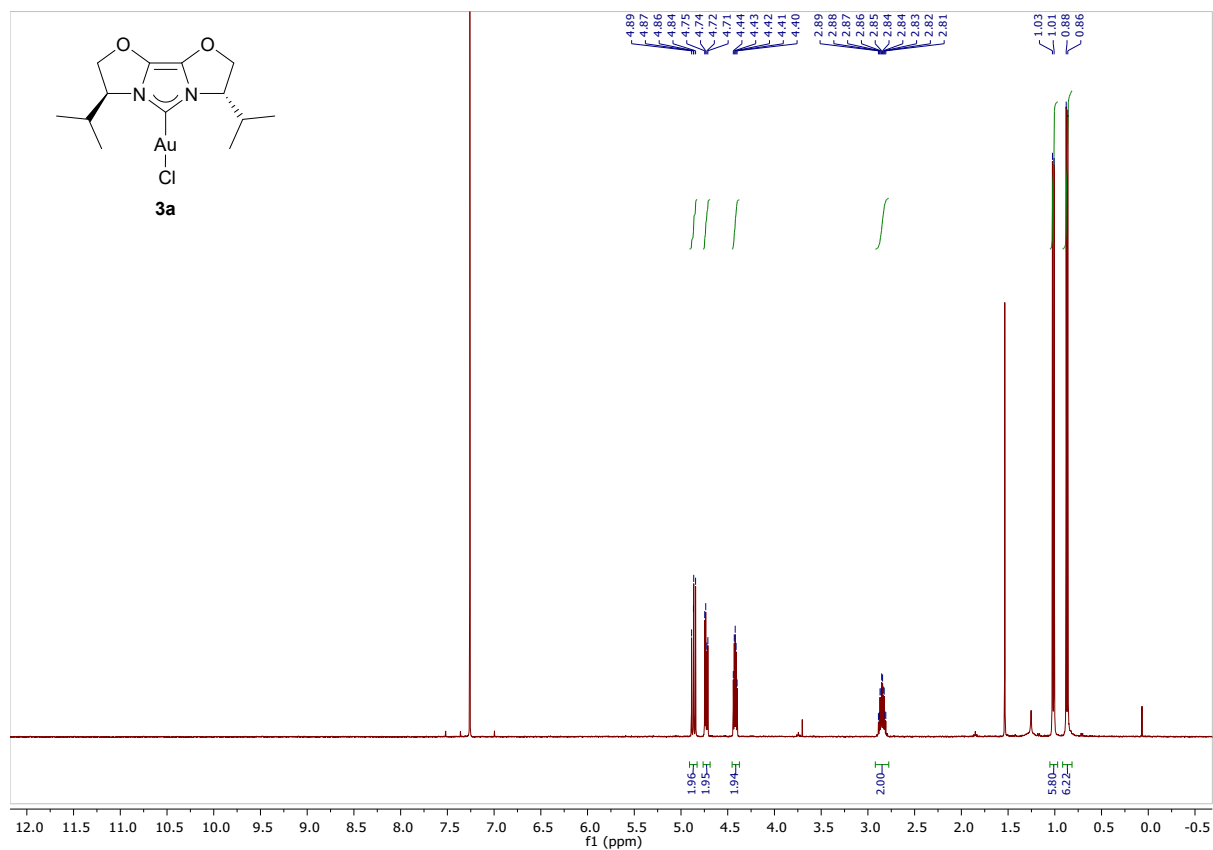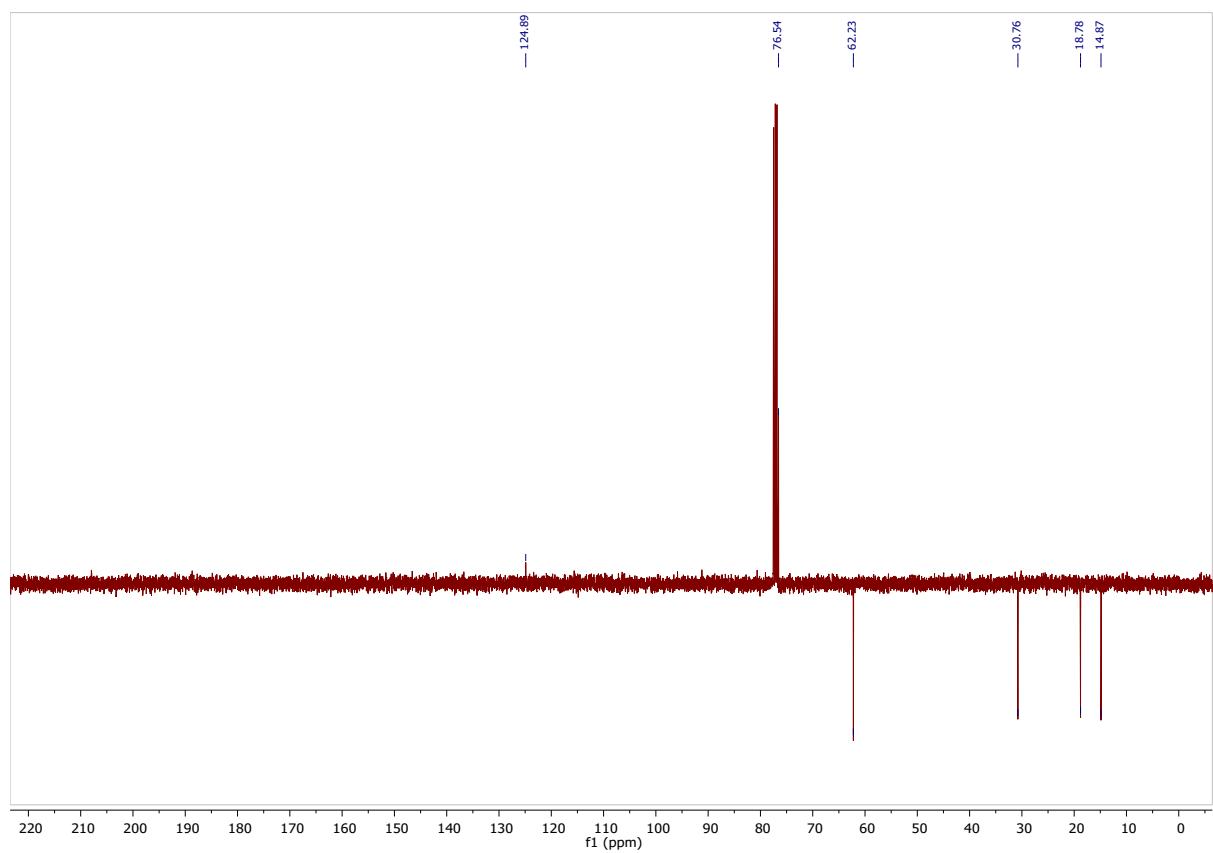

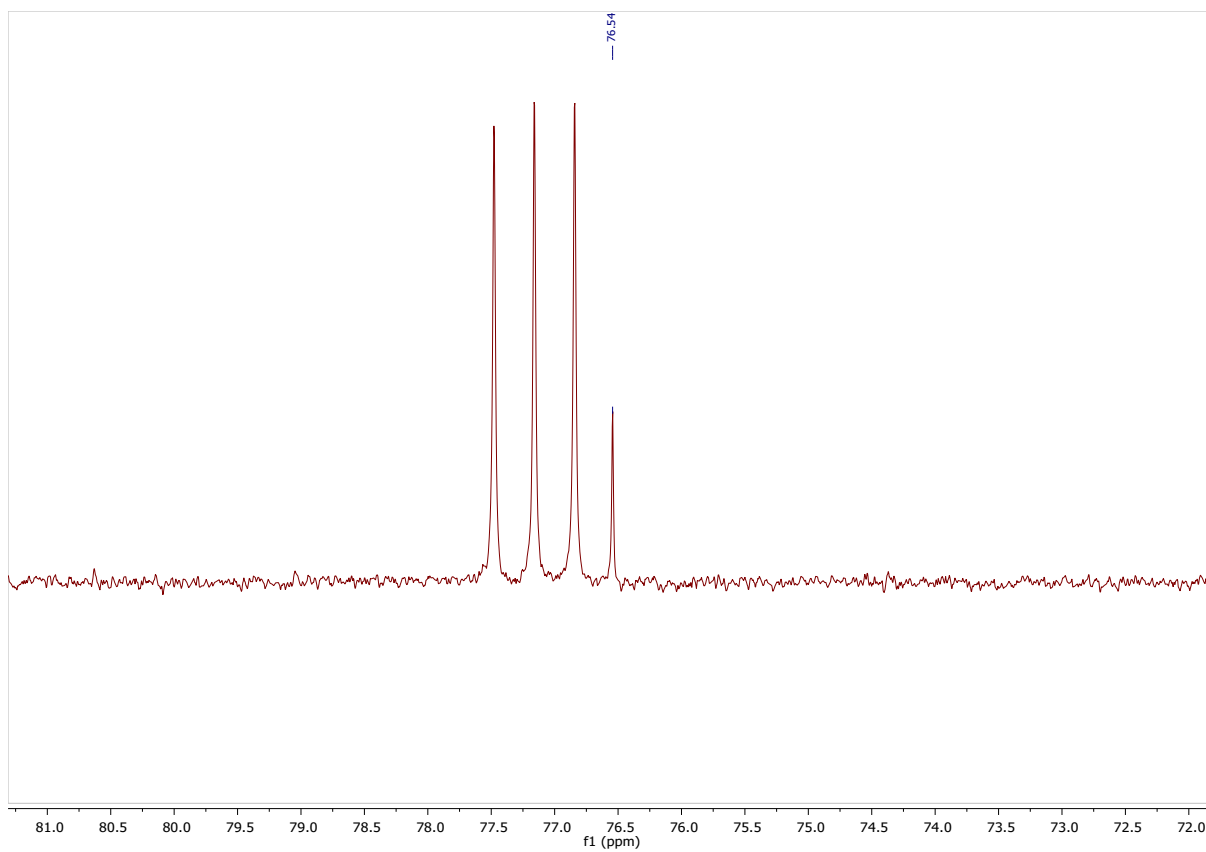

**<sup>1</sup>H NMR and <sup>13</sup>C {<sup>1</sup>H} NMR for [Au(1Biox<sup>4</sup>Bu)Cl] (3b):**

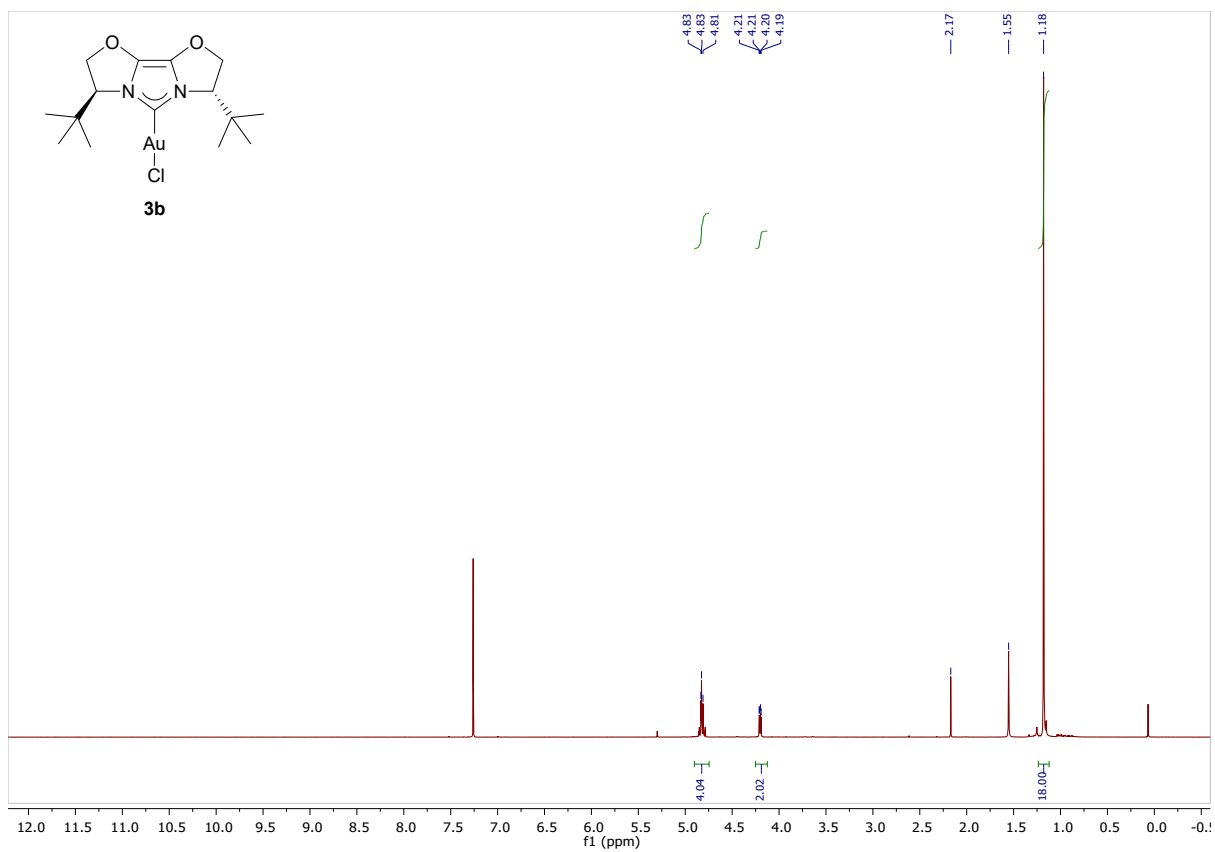

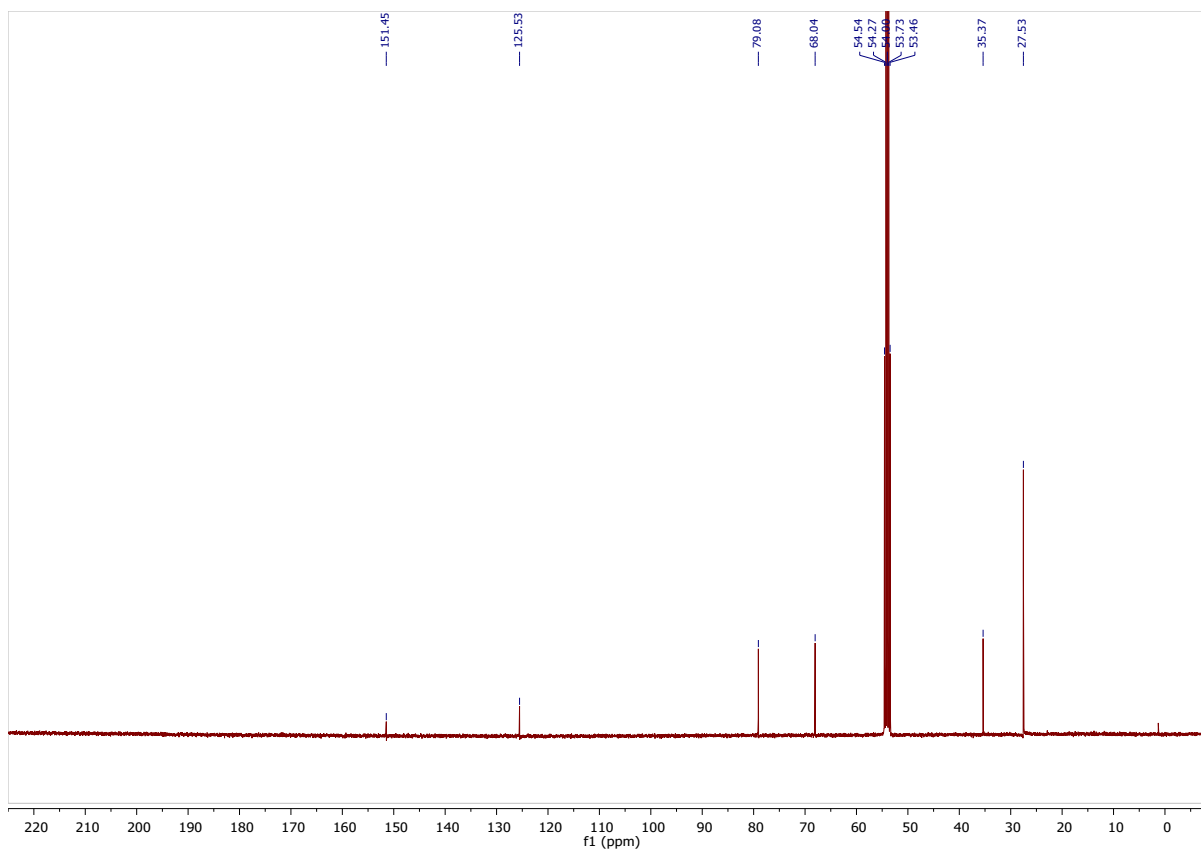

**<sup>1</sup>H NMR and <sup>13</sup>C {<sup>1</sup>H} NMR for [Au(1BioxMe<sub>4</sub>)Cl] (3c):**

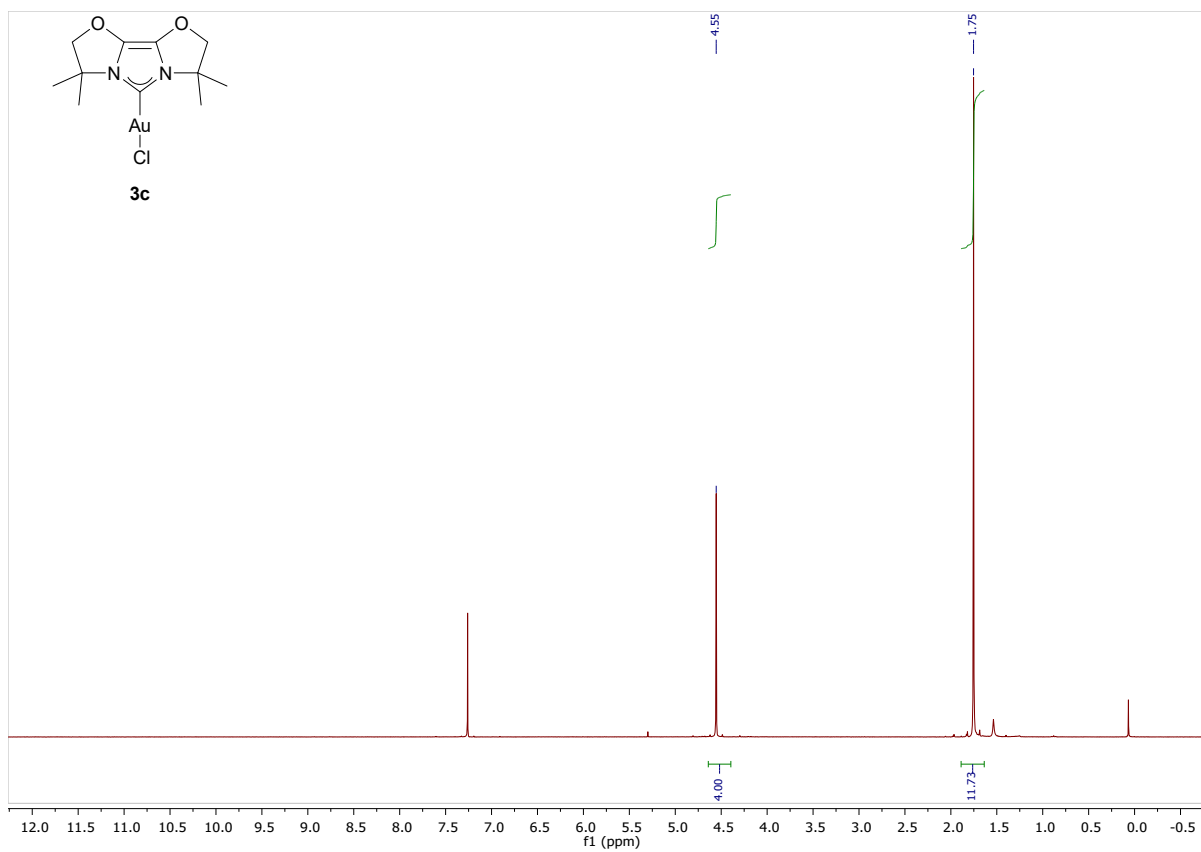



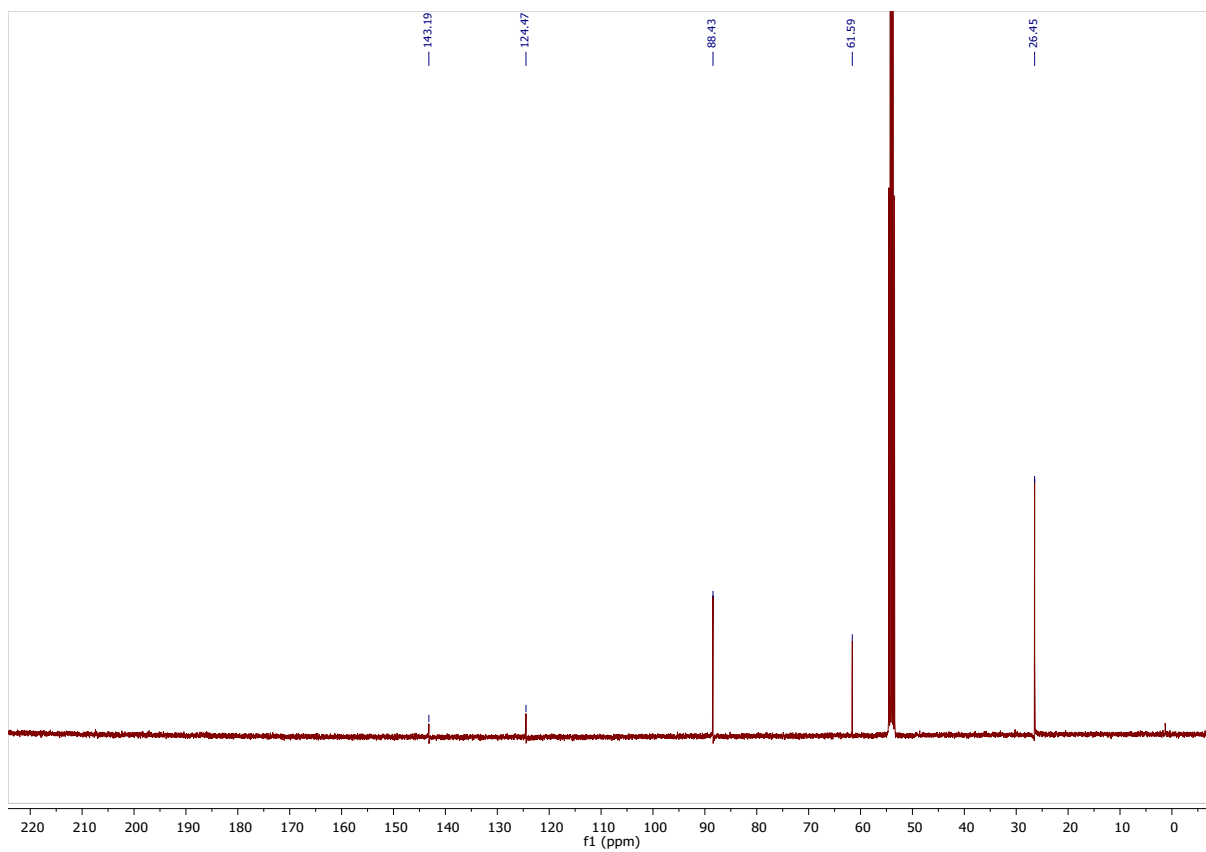

**<sup>1</sup>H NMR and <sup>13</sup>C {<sup>1</sup>H} NMR for [Au(I Biox6)Cl] (3d):**

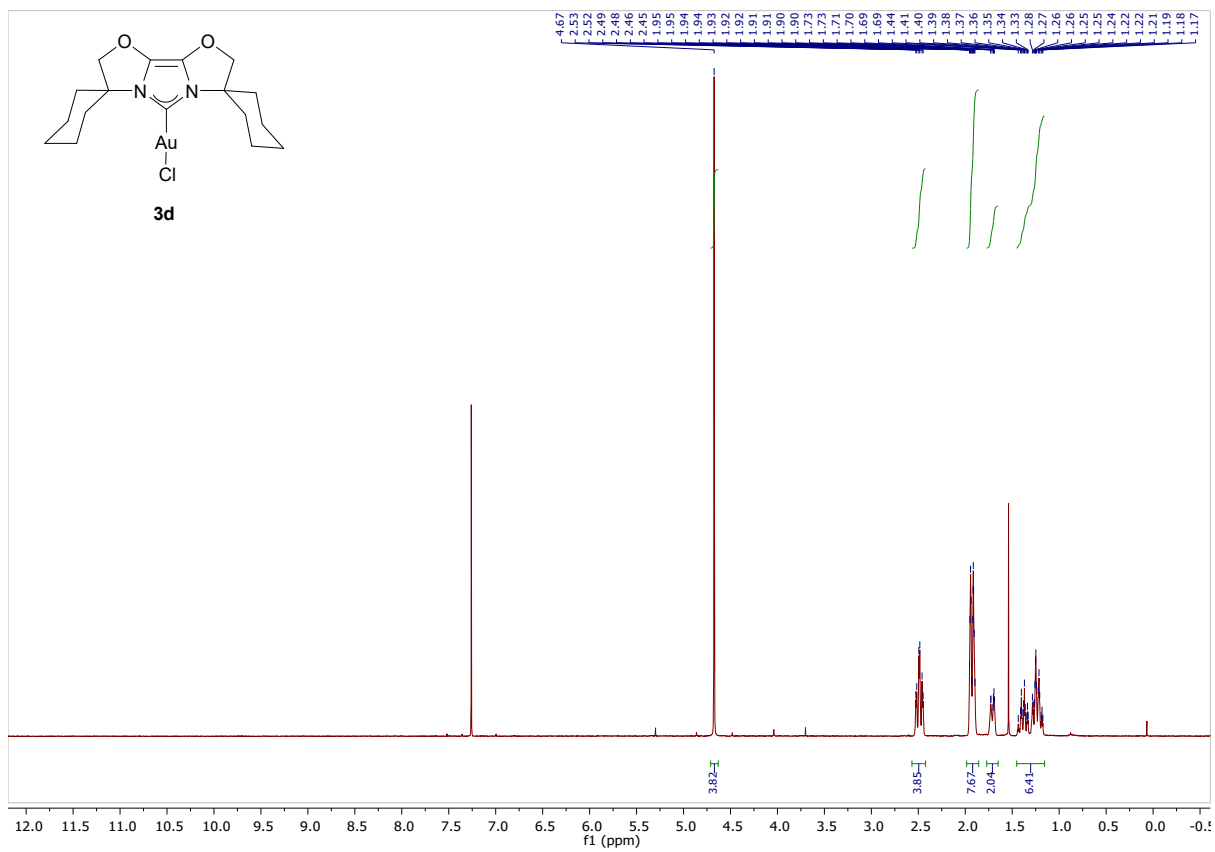

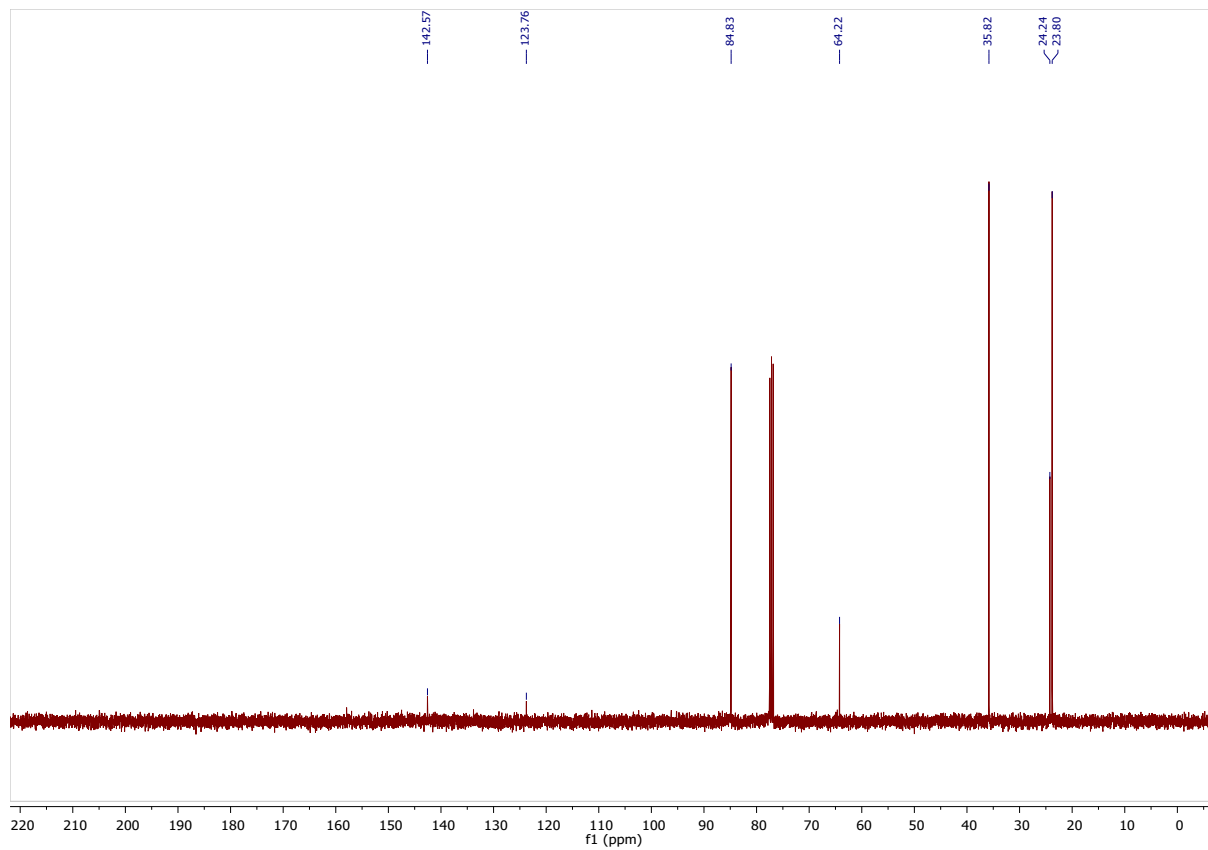

Supplement: d3dt01357j1.pdf [file d3dt01357j1.pdf]
